# Supplementary material
Source: Research Square preprint supplement (doi:10.21203/rs.3.rs-10319687/v1)
Supplement: Supplementary file 1 [file 93e1207f2eeb2645e4bce92a.docx]

**Supplementary Notes**

**quantmsdiann: a scalable SDRF-driven DIA-NN workflow for reanalysis of single-cell, spatial, and bulk proteomics datasets**

Qi-Xuan Yue 1; Yufei Shen 1; Chengxin Dai 2; Asier Larrea-Sebal 3,4; Henry Webel 5; Jose Nimo 6,7,8; Fabian Coscia 6,8; Orhun Kok 9; Nikolai Slavov 9,10; Juan Antonio Vizcaı́no 3; Timo Sachsenberg 11,12; Mingze Bai 1; Vadim Demichev 13; Yasset Perez-Riverol 3,*

1 Chongqing Key Laboratory of Big Data for Bio Intelligence, Chongqing University of Posts and Telecommunications, Chongqing, China.

2 State Key Laboratory of Proteomics, Beijing Proteome Research Center, National Center for Protein Sciences (Beijing), Beijing Institute of Life Omics, Beijing, China.

3 European Molecular Biology Laboratory, European Bioinformatics Institute (EMBL-EBI), Wellcome Genome Campus, Hinxton, Cambridge, UK.

4 Department of Biochemistry and Molecular Biology, Universidad del País Vasco UPV/EHU, Bilbao, 48080, Spain.

5 Novo Nordisk Foundation Center for Protein Research, Faculty of Health and Medical Sciences, University of Copenhagen, Copenhagen, Denmark.

6 Spatial Proteomics Group, Max-Delbrück-Center for Molecular Medicine in the Helmholtz Association (MDC), Berlin, Germany.

7 Charité – Universitätsmedizin Berlin, corporate member of Freie Universität Berlin and Humboldt-Universität zu Berlin, Berlin, Germany.

8 German Cancer Consortium (DKTK), Partner Site Berlin, Heidelberg, Germany.

9 Department of Bioengineering and Barnett Institute, Northeastern University, Boston, Massachusetts, USA

10 Parallel Squared Technology Institute, Watertown, Massachusetts, USA.

11 Department of Computer Science, Applied Bioinformatics, University of Tübingen, Tübingen, Germany.

12 Institute for Bioinformatics and Medical Informatics, University of Tübingen, Tübingen, Germany.

13 Quantitative Proteomics Laboratory, Charité – Universitätsmedizin Berlin, Berlin, Germany.

[**Supplementary Note 1: Building DIA-NN container images** 3](#_Toc234325845)

[**Supplementary Note 2: Datasets benchmarked and reanalyzed** 3](#_Toc234325846)

[**Supplementary Note 3: Identification filtering and protein counting** 5](#_Toc234325847)

[**Supplementary Note 4: Per-process runtime and resource envelopes** 6](#_Toc234325848)

[**Supplementary Note 5: ProteoBench protein-group depth across DIA-NN versions** 7](#_Toc234325849)

[**Supplementary Note 6: Per-cohort completeness and overlap (cell-line reanalyses)** 8](#_Toc234325850)

[**Supplementary Note 7: Software and resources** 10](#_Toc234325851)

# **Supplementary Note 1: Building DIA-NN container images**

Every quantmsdiann step runs in a versioned container (Docker, Singularity, or Apptainer). Most images are pulled automatically from public registries (BioContainers or ghcr.io/bigbio); DIA-NN is the exception because its license restricts redistribution. Only DIA-NN 1.8.1 may be redistributed, so it is shipped as the default and pulled from BioContainers (*docker.io/biocontainers/diann:v1.8.1_cv1*). Releases from 1.9 onward (1.9.2 through 2.5.1, including the 2.5.1-enterprise build) cannot be redistributed and are therefore *not* shipped as images; instead, the companion quantms-containers repository (<https://github.com/bigbio/quantms-containers>) provides one build recipe per release. A user with a valid DIA-NN download builds the image locally from the matching recipe, for example:

*cd diann-2.5.1 && docker build -t ghcr.io/bigbio/diann:2.5.1 .*

For quantmsdiann to select a locally built image automatically, it must be tagged with the prefix ghcr.io/bigbio/diann: followed by the release tag (e.g. ghcr.io/bigbio/diann:2.5.1 or ghcr.io/bigbio/diann:2.5.1-enterprise); the workflow then resolves the container for the requested version through the corresponding diann_v*X_Y_Z* profile selected at runtime.

# **Supplementary Note 2: Datasets benchmarked and reanalyzed**

**Table 1** lists every public dataset used in this study. For each dataset, an SDRF was prepared from the original sample metadata; every accession in the table below links to its validated SDRF in the curated bigbio/sdrf-annotated-datasets collection (<https://github.com/bigbio/sdrf-annotated-datasets>). Raw files were downloaded from PRIDE and MassIVE using pridepy. For each cell-line reanalysis cohort, the original published quantification was downloaded from a public repository (the PRIDE deposition, or an associated repository such as figshare for ProCan) and used as the comparator. The cell-line bulk DIA cohorts were assembled by programmatic search of PRIDE Archive via the PRIDE API, filtering for projects annotated as DIA acquisition on human samples with at least one standardised cell line listed in the Cellosaurus reference, downloadable raw files, and SDRF-compatible sample metadata.

Datasets benchmarked and reanalysed with quantmsdiann. The “Public date” column is the PRIDE/MassIVE public-release year of the deposit, which can predate the associated publication year cited in the main text (e.g. PXD003539 was deposited in 2016 and published as Guo *et al.* 2019; PXD004701 deposited 2016, published as Sun *et al.* 2023).

| Accession | Instrument | Type | Public date | |
| --- | --- | --- | --- | --- |
| ***ProteoBench benchmarks*** | | | |
| PXD049412 | Orbitrap Astral | Single-cell (Module 9) | 2024 | |
| PXD062685 | timsTOF SCP | diaPASEF (Module 5) | 2025 | |
| PXD070049 | ZenoTOF 7600 | Mixed-species (Module 10) | 2025 | |
| Module 7 | Orbitrap Astral | Mixed-species (Module 7) | 2025 | |
| ***Bulk cell-line panel*** | | | |
| PXD003539 | TripleTOF 5600 | Cell line (NCI-60) | 2016 | |
| PXD030304 | TripleTOF 6600 | Cell line (ProCan) | 2022 | |
| PXD004701 | TripleTOF 5600 | Cell line (Sun 2023) | 2016 | |
| PXD041421 | timsTOF (diaPASEF) | Cell line (Wang 2023) | 2023 | |
| PXD017199 | Q Exactive Plus | Cell line (Tognetti 2021) | 2021 | |
| ***Single-cell proteomics*** | | | |
| PXD046357 | Orbitrap Astral | Single-cell HeLa (Astral) | 2024 | |
| PXD049412 | Orbitrap Astral | Single-cell A549/H460 (Bubis 2025; also, Module 9 benchmark) | 2024 | |
| MSV000093870 | Q Exactive | Single-cell oocyte plexDIA (Galatidou 2024) | 2024 | |
| ***Phosphoproteomics*** | | | |
| PXD034128 | timsTOF Pro | Phospho diaPASEF (Skowronek 2022) | 2022 | |
| PXD034623 | Orbitrap Exploris 480 | Phospho directDIA (Galectin-1) | 2023 | |
| PXD049692 | timsTOF HT | Phospho diaPASEF (NK cells) | 2024 | |
| ***Spatial proteomics*** | | | |
| PXD064049 | timsTOF SCP | Spatial DVP, diaPASEF (MYCN neuroblastoma) | 2025 | |
| ***Scalability experiment*** | | | |
| PXD071075 | Orbitrap Eclipse | Single-cell | 2025 | |

# **Supplementary Note 3: Identification filtering and protein counting**

All quantmsdiann identification counts follow a single rule with exactly one admissible q-value filter per quantity and nothing else (no contaminant/target filter, no positive-quantity filter; zero quantities are counted; decoys are dropped). *Per-run* numbers (per cell, per run): protein groups at PG.Q.Value  only; precursors at Q.Value  only. *Global* (dataset-total/union) numbers: protein groups at Lib.PG.Q.Value  only; precursors at Lib.Q.Value  only. For deposited datasets, the “original” count is the deposited analysis result: the row count of the deposited pg_matrix/pr_matrix where only a count matrix is available (HeLa, spatial), or a protein count recomputed from the deposited search output for the reanalysis-recovery cohorts (NCI-60, ProCan, Sun; see below). In plexDIA mode, the channel is the per-run unit, so per-cell precursors are counted at Channel.Q.Value  in addition to Q.Value . plexDIA protein-group identification counts are not compared across DIA-NN versions, because the channel-level PG.Q.Value confidence used here is not defined in pre-2.0 output; for plexDIA, we report quantmsdiann depth on its own and assess reproducibility against the deposited analysis rather than an identification gain. For the reanalysis-recovery figure, each “original” count is recomputed from the deposited or public-repository data rather than transcribed from the paper, so every bar is reproducible: NCI-60 (PXD003539) and Sun (PXD004701) from the deposited PRIDE OpenSWATH analyses (for NCI-60, proteins with distinct peptides in feature_alignment_requant_matrix.tsv, reproducing the published 4,284; for Sun, proteotypic SwissProt proteins at the OpenSWATH peak-group q-value  in 1R_all_id.txt, 6,183, reproducing the published 6,091), and ProCan (PXD030304) from the authors’ figshare peptide-count matrix (proteins with supporting peptides, 6,698, reproducing the published 6,692). The quantmsdiann count is computed under its own global rule (Lib.PG.Q.Value , with the -peptide refinement where the original reports a -peptide headline); no original-study consistency or detection filter is applied to the quantmsdiann side. Three caveats bound the cross-deposit comparisons (main-text Experimental Procedures): differences in FDR calibration across search-engine generations, the use of each original study’s own counting criterion, and possible differences in protein sequence database and search settings between the deposited analysis and the reanalysis (including contaminant databases that are often not deposited, as for the spatial DVP cohort PXD064049). Because quantmsdiann applies one harmonised FASTA and parameter set across all cohorts, residual count differences attributable to such undocumented database or setting choices cannot be fully excluded.

# **Supplementary Note 4: Per-process runtime and resource envelopes**

These figures decompose the end-to-end wall-clock and resource use reported in main-text Fig. 2b by Nextflow process, derived from trace.txt records collected across the ProteoBench benchmark cohorts and the PXD071075 single-cell production sweep.

**
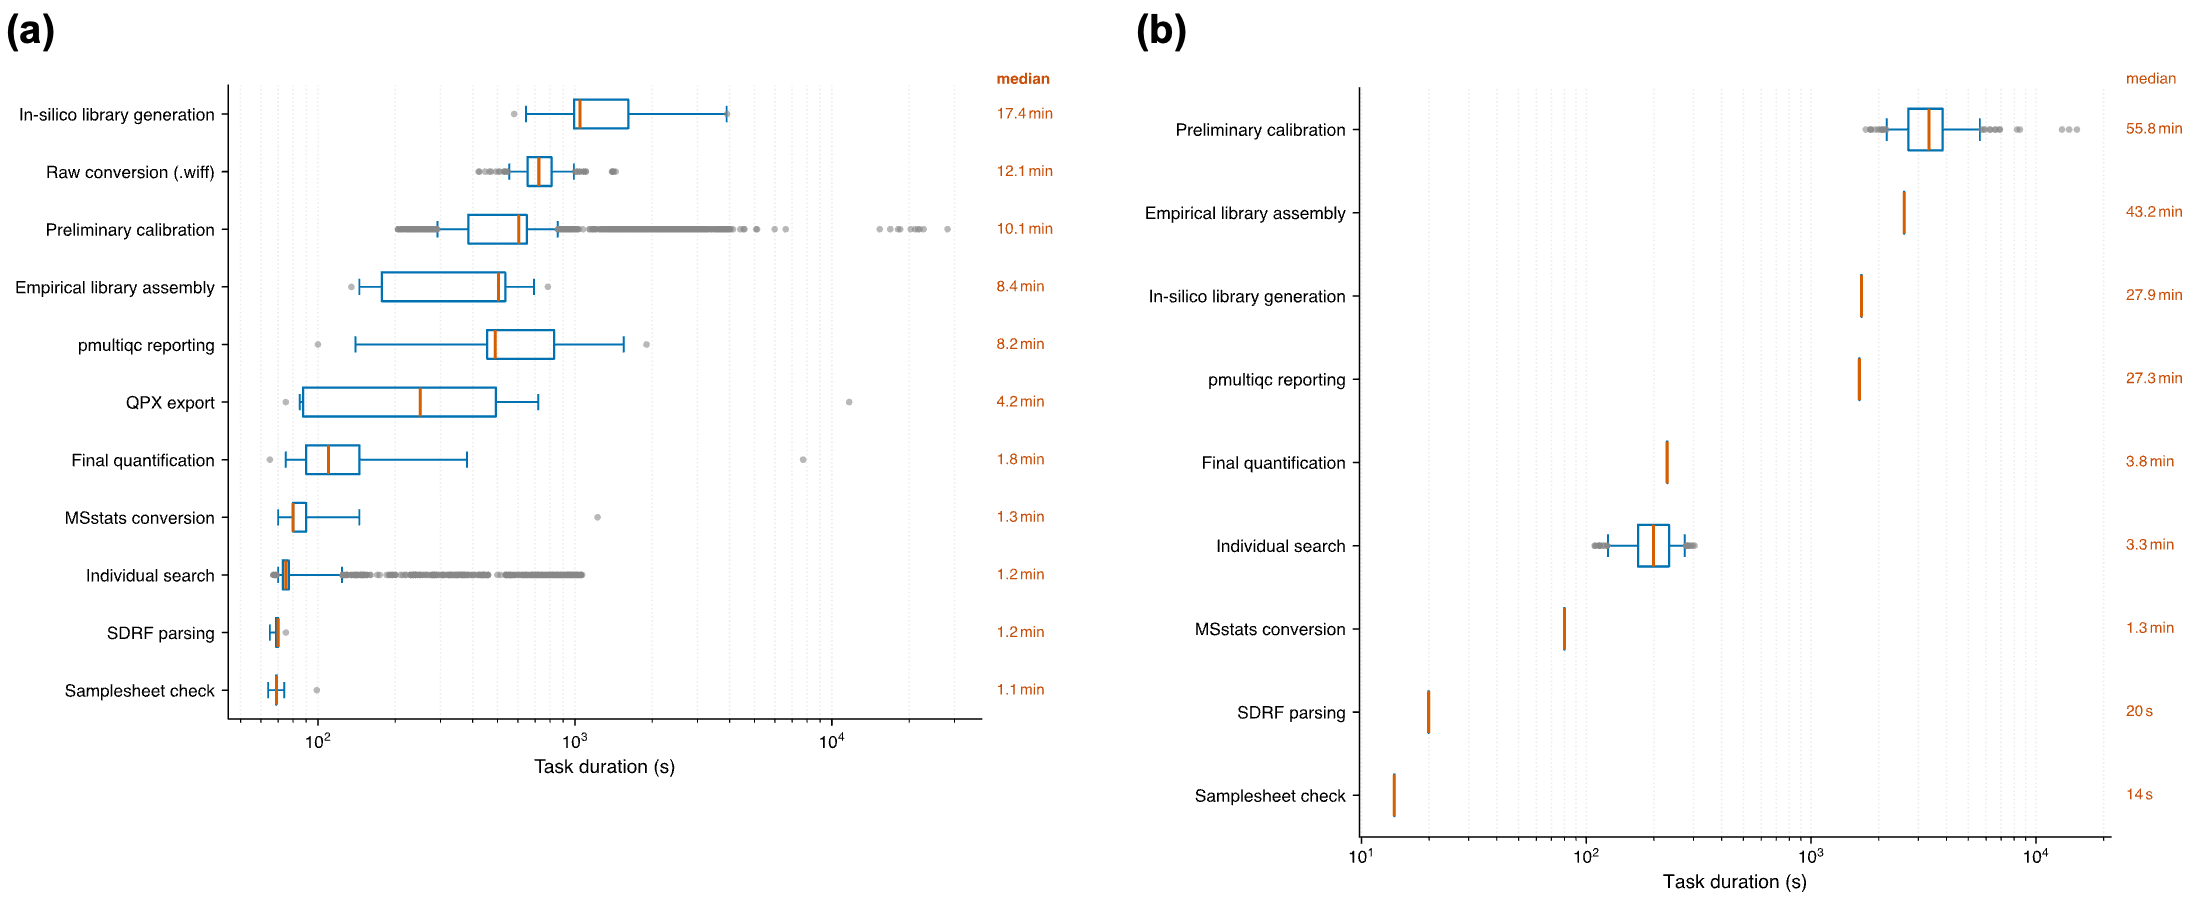
**

**Figure S1:** Per-step wall-clock distribution across Nextflow processes on the EBI cluster and an independent third-party cluster. **(a)** Task wall-clock time (boxplot, median and IQR) for each quantmsdiann process across the ProteoBench cohorts and the PXD071075 cluster-node sweep on the EBI HPC cluster. The per-file parallel stages (file_preparation, preliminary_analysis, individual_analysis) run once per raw file and set the parallelisation envelope. The collective stages (insilico_library_generation, assemble_empirical_library, final_quantification, diann_msstats) run once per cohort and set the wall-clock floor. **(b)** The same breakdown for a run executed independently by another group on a non-EBI SLURM cluster (Max Delbrück Center, Berlin; 279 raw files, DIA-NN 2.5.0, quantmsdiann v2.1.0, Singularity profile; total wall-clock 7 h 49 m). The process structure holds on third-party infrastructure without modification, showing the workflow's portability.


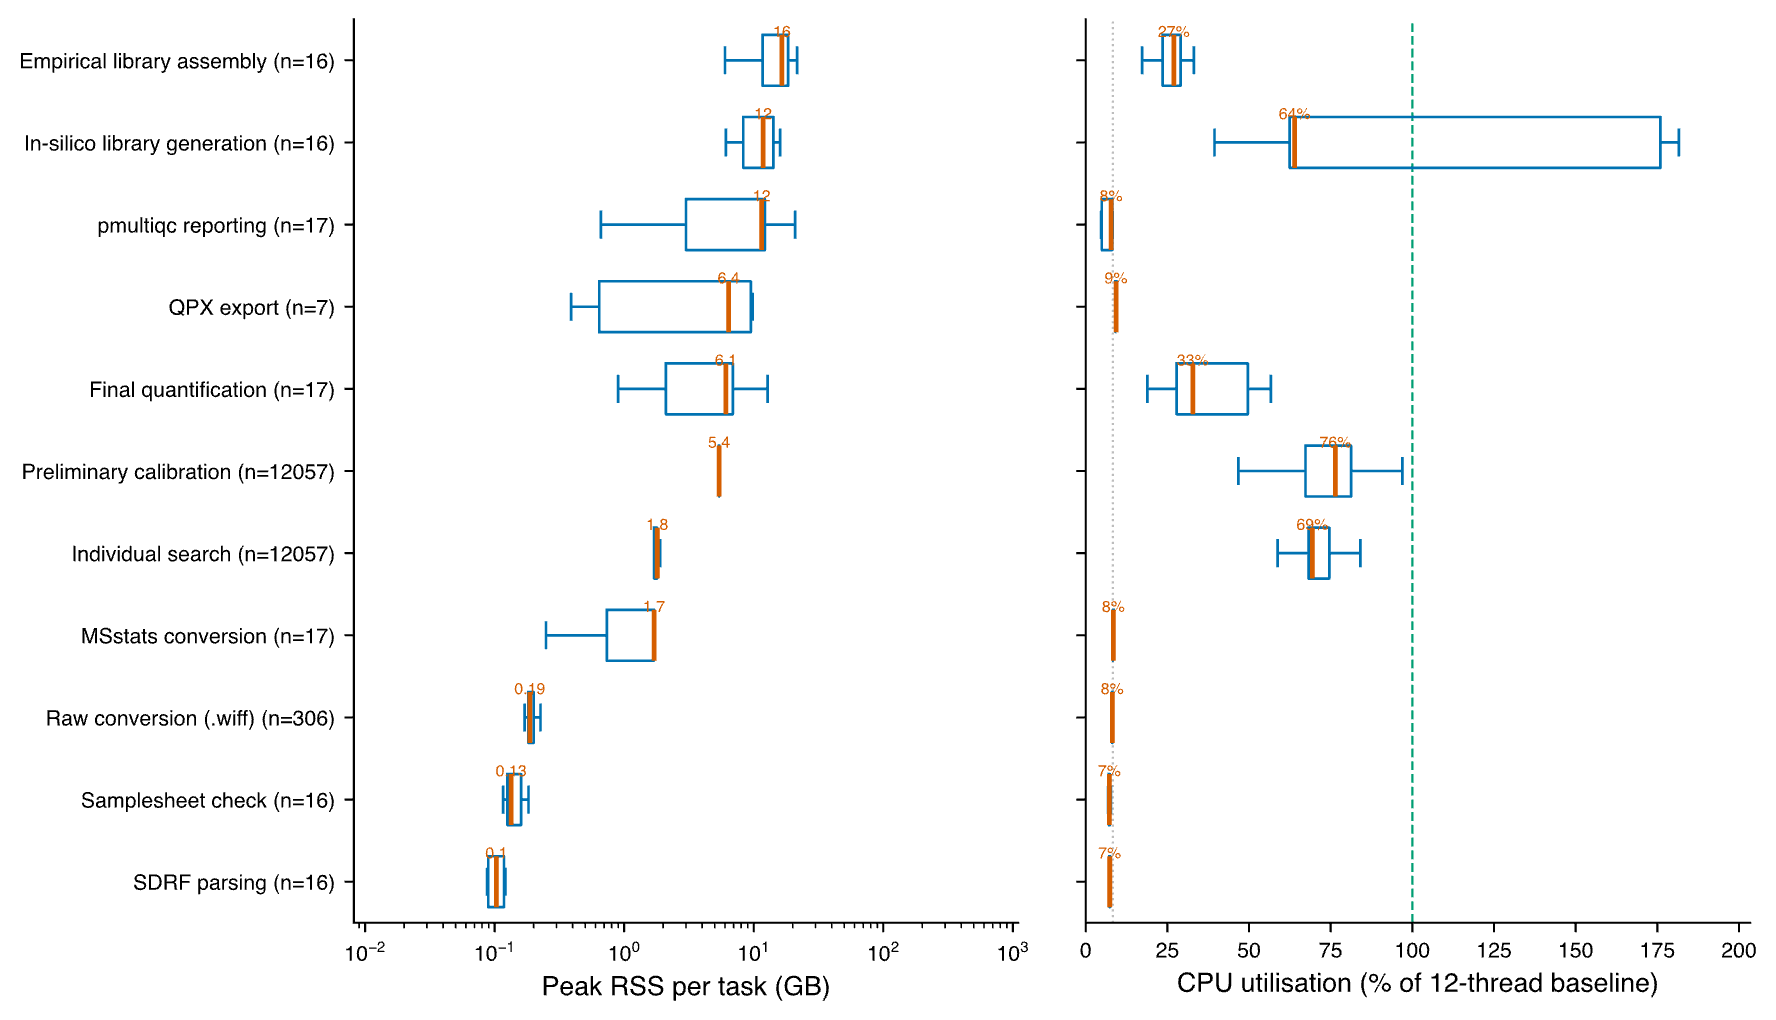


**Figure S2: Peak memory and CPU envelope per Nextflow process.** Per-task peak resident-set-size memory (left panel) and CPU utilisation (right panel) per quantmsdiann process across the ProteoBench benchmark cohorts and the PXD071075 cluster-node sweep. Box plots show the median (vermillion) and interquartile range; the per-step task count is given in each y-axis label and the median is printed above each box. CPU utilisation is expressed as a percentage of quantmsdiann’s 12-thread DIA-NN allocation, so a step that parallelises beyond its 12 allotted threads exceeds the 100% baseline (green dashed line); the in-silico library-generation step does so, while single-threaded glue steps sit near (grey dotted line). The collective FINAL_QUANTIFICATION stage dominates memory use on large cohorts; per-file stages remain well within the commodity 8–16 GB per-task envelope typical of HPC partitions.

# **Supplementary Note 5: ProteoBench protein-group depth across DIA-NN versions**

The main text reports ProteoBench quantification accuracy (Fig. 2c) and the per-run protein-group depth behind the same runs (Fig. 2d); the precursor and complete-profile depth are summarised here. Total precursors (at the global 1% Lib.Q.Value) rise by 9–22% from DIA-NN 1.8.1 to 2.5.1-enterprise on all four modules (largest on timsTOF diaPASEF, 102,528  124,756); proteins quantified in every run rise by up to 18% (e.g. single-cell Astral, 6,246  7,299, %). Protein groups are counted from the per-precursor DIA-NN report at a 1% run-specific protein-group q-value (PG.Q.Value); the per-run average is shown in Fig. 2d.

# **Supplementary Note 6: Per-cohort completeness and overlap (cell-line reanalyses)**

These figures complement main-text Fig. 4 with per-protein peptide counts, gene/accession overlap, and per-tissue protein recovery across the reanalysed cohorts.


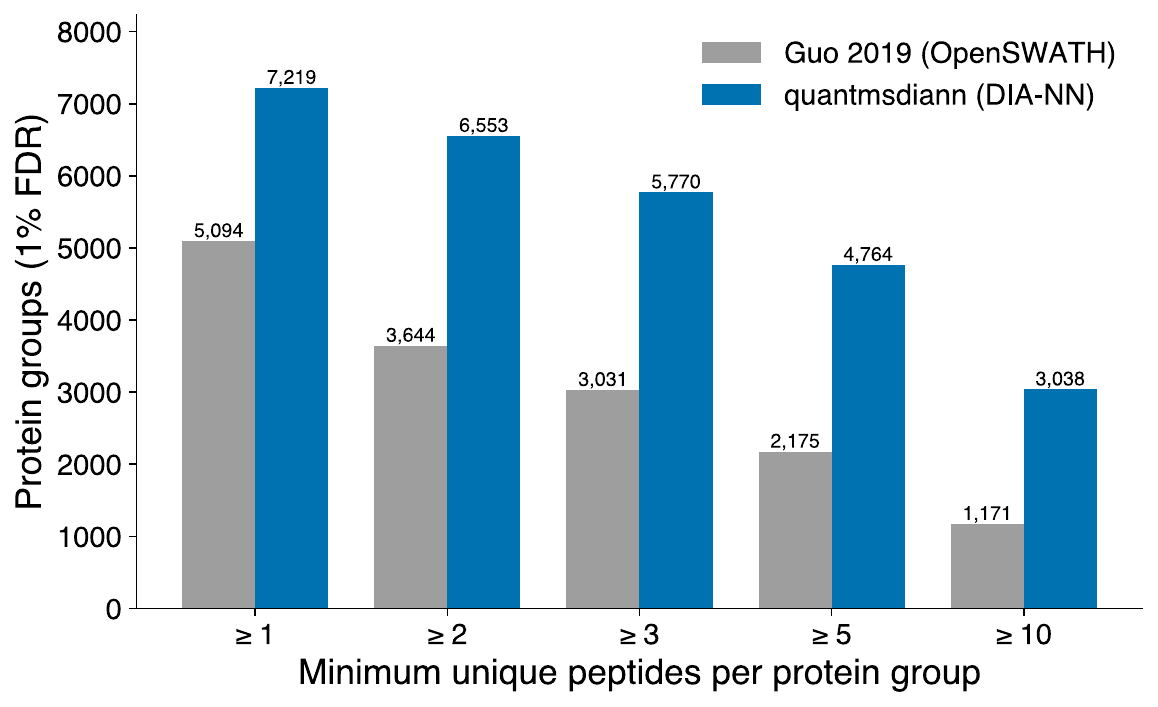


**Figure S3: PXD003539 - distribution of peptides per protein group.** quantmsdiann (DIA-NN, blue) versus Guo 2019 OpenSWATH (grey) on the same NCI-60 raw data.


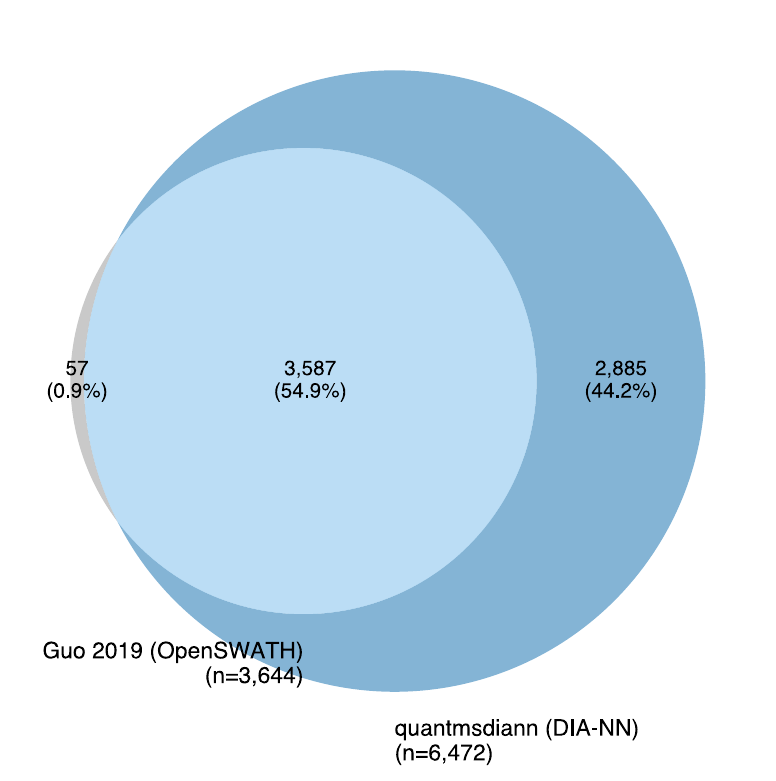


**Figure S4:** PXD003539 - UniProt-accession overlap between original OpenSWATH analysis and quantmsdiann reanalysis.


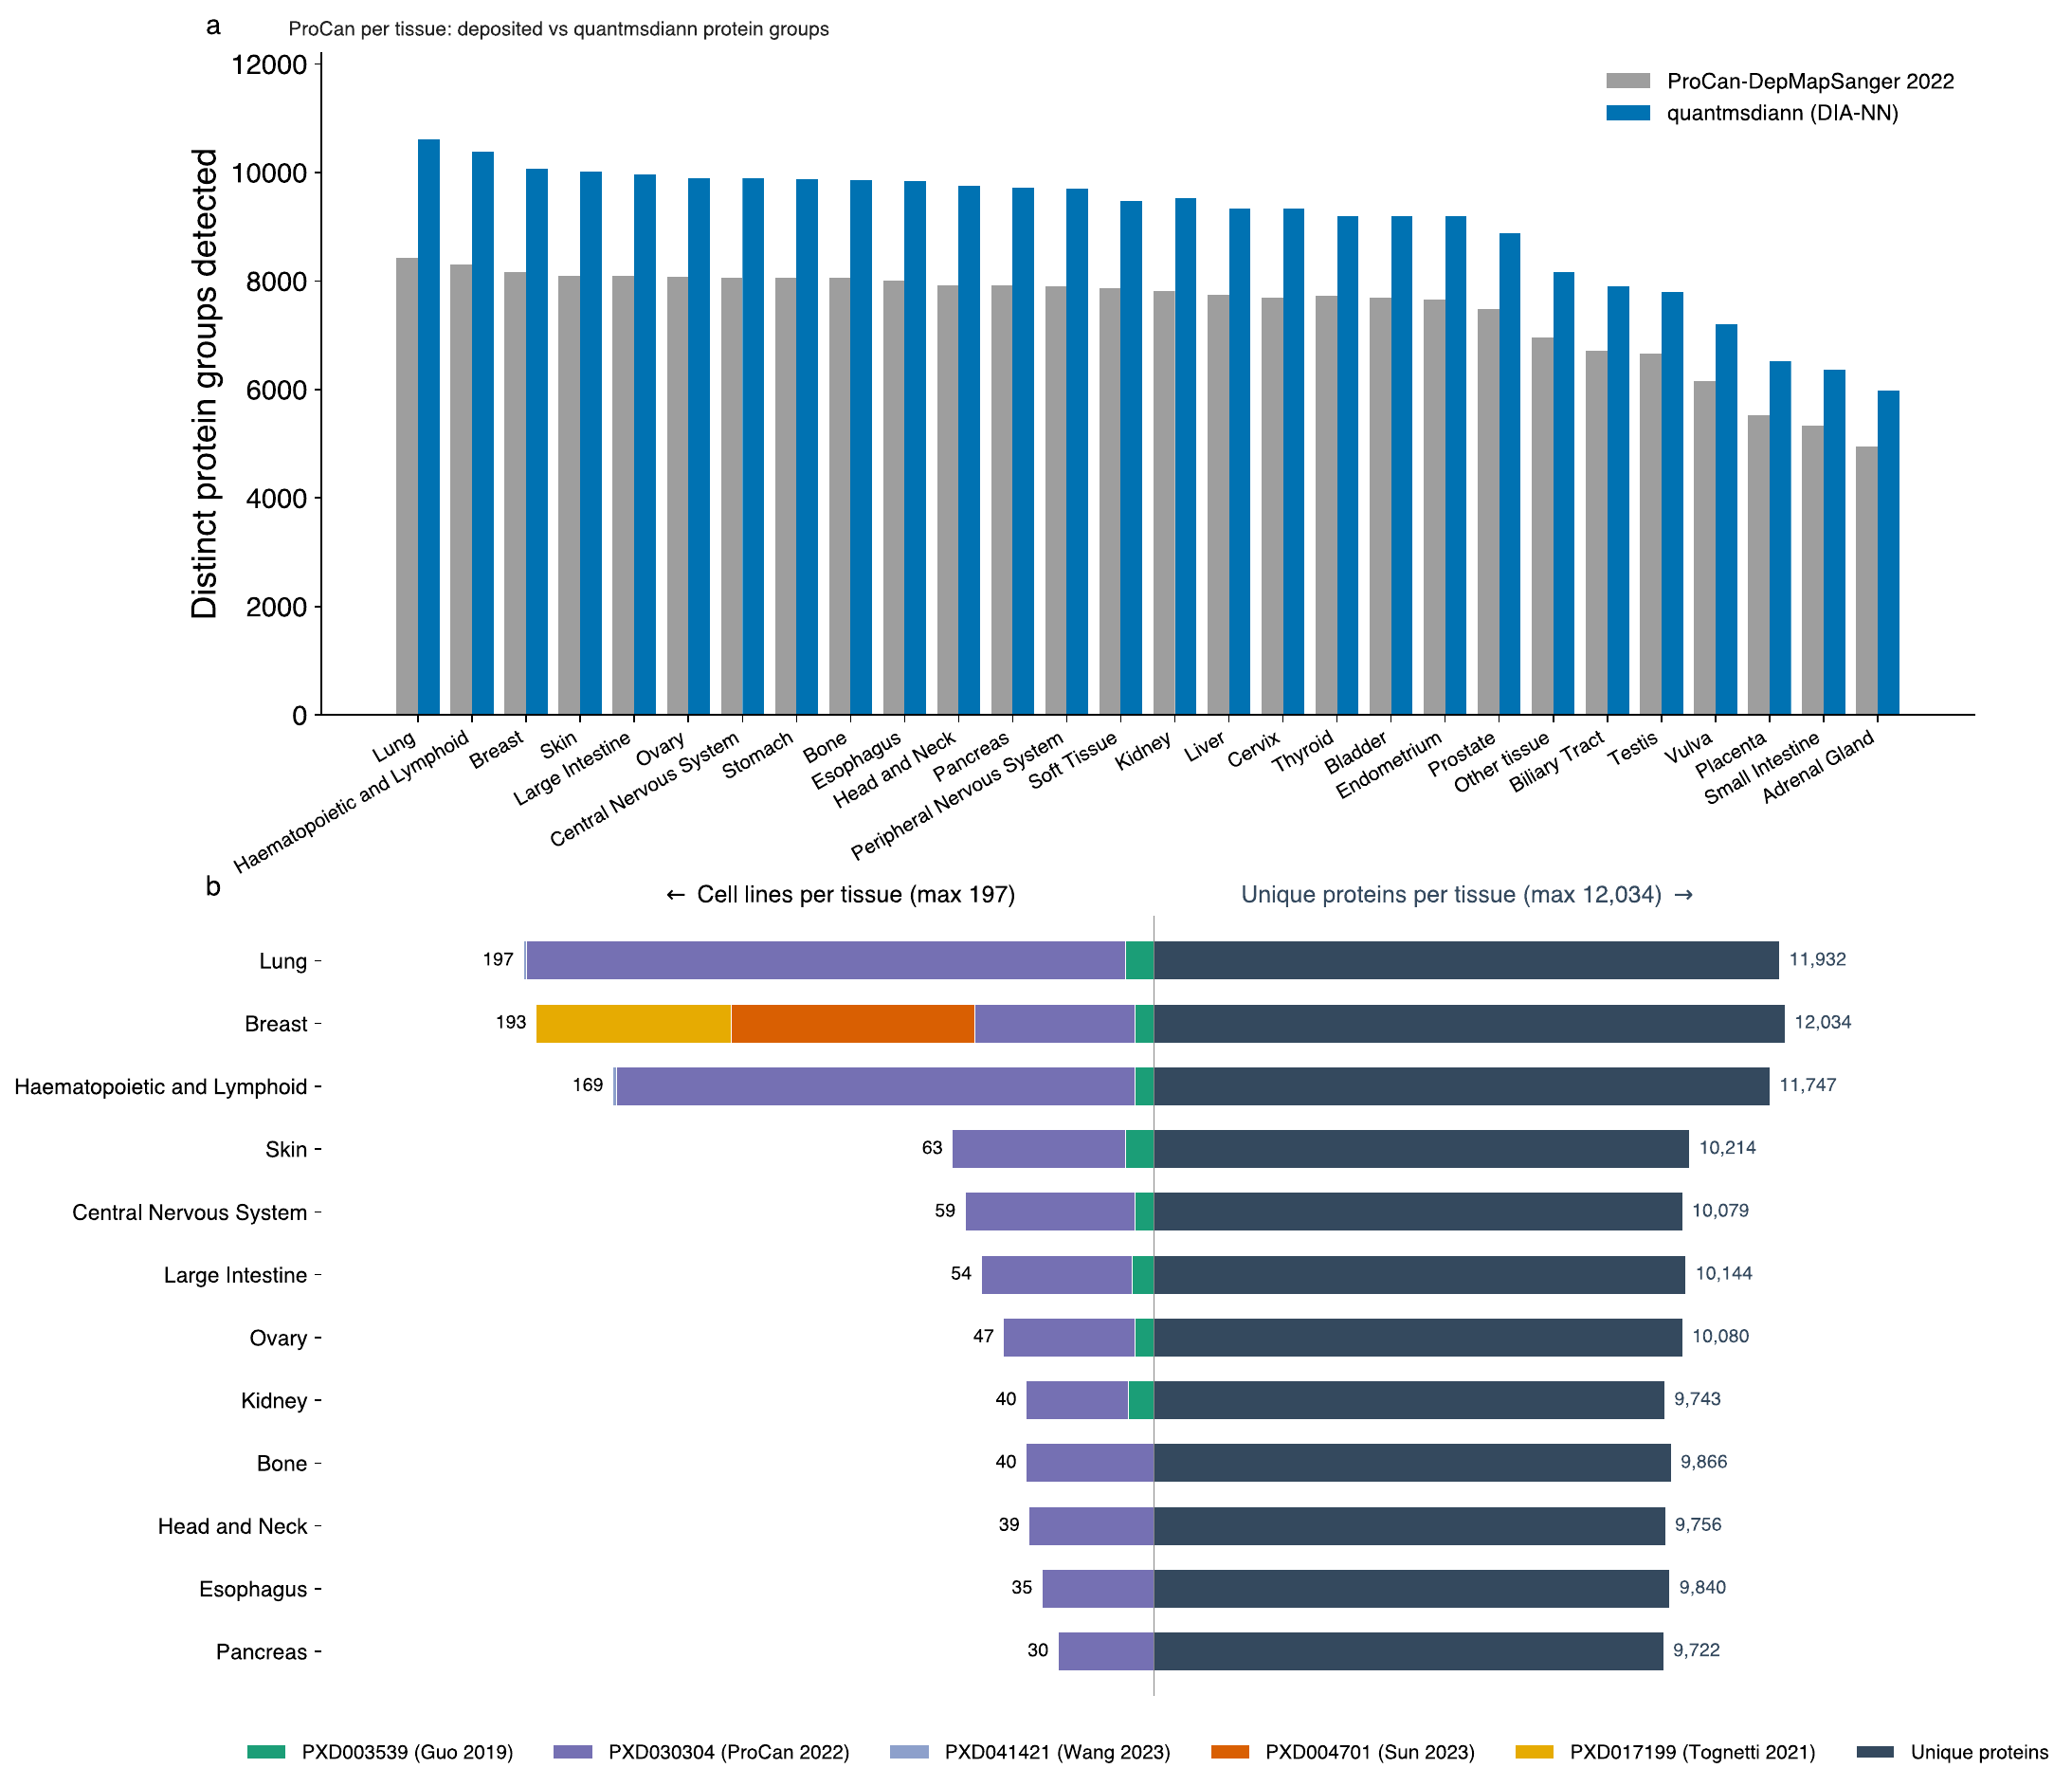


**Figure S5: Pan-cohort of five public DIA cell-line reanalyses by quantmsdiann under a single SDRF-driven invocation.** Combines PXD003539 (NCI-60, Guo 2019), PXD030304 (ProCan-DepMapSanger, 947 lines), PXD004701 (Sun 2023, 76 breast-cancer lines), PXD041421 (Wang 2023), and PXD017199 (Tognetti 2021, 67 breast-cancer lines). (**a**) ProCan-DepMapSanger (PXD030304): distinct protein groups detected per tissue of origin, deposited analysis (grey) versus the quantmsdiann reanalysis (blue) on the same raw data. (**b**) Back-to-back per-tissue summary across the combined panel: cell lines contributing to each tissue, stacked by cohort (left), and the union of unique UniProt proteins detected per tissue (right); the most represented of the 29 tissue categories are shown.

# **Supplementary Note 7: Software and resources**

**Table 2** lists the software packages, formats, and public resources used by quantmsdiann and in this study, with their canonical repositories or portals. quantmsdiann and its supporting tools (sdrf-pipelines, pmultiqc, QPX, wiffconverter, container recipes) are released open-source under the bigbio organisation; per-version DIA-NN container images are built from the recipes in quantms-containers (**Supplementary Note 1**).

Software, formats, and public resources used in this study, with their canonical repositories or portals.

| **Name** | **Role in this study** | **Repository / URL** |
| --- | --- | --- |
| quantmsdiann | SDRF-driven DIA-NN reanalysis workflow (this work) | <https://github.com/bigbio/quantmsdiann> |
| quantms | Sibling SDRF-driven multi-engine quantitative proteomics pipeline | <https://github.com/bigbio/quantms> |
| quantms-containers | Per-release DIA-NN container recipes | <https://github.com/bigbio/quantms-containers> |
| SDRF-Proteomics | Sample-and-Data-Relationship-Format metadata standard | <https://github.com/bigbio/proteomics-sample-metadata> |
| sdrf-pipelines | SDRF validation and DIA-NN configuration generation (convert-diann) | <https://github.com/bigbio/sdrf-pipelines> |
| qpx | Quantitative Proteomics eXchange format and qpxc CLI | <https://github.com/bigbio/qpx> |
| pmultiqc | Proteomics QC reporting (MultiQC extension) | <https://github.com/bigbio/pmultiqc> |
| wiffconverter | SCIEX .wiff to mzML conversion | <https://github.com/bigbio/wiffconverter> |
| pridepy | PRIDE/MassIVE raw-file download client | <https://github.com/PRIDE-Archive/pridepy> |
|  |  |  |
| DIA-NN | Data-independent acquisition search and quantification engine | <https://github.com/vdemichev/DiaNN> |
| Nextflow | Workflow orchestration engine | <https://github.com/nextflow-io/nextflow> |
| nf-core | Community framework and conventions for the workflow | <https://nf-co.re> |
| MultiQC | Aggregated analysis-report framework (extended by pmultiqc) | <https://github.com/MultiQC/MultiQC> |
| MSstats | Statistical quantification; target output format | <https://github.com/Vitek-Lab/MSstats> |
| ProteoBench | Community benchmarking platform for DIA workflows | <https://github.com/Proteobench/ProteoBench> |
| ThermoRawFileParser | Thermo .raw to mzML conversion | <https://github.com/compomics/ThermoRawFileParser> |
|  |  |  |
| Docker | Container runtime (workflow profile) | <https://www.docker.com> |
| Apptainer (Singularity) | HPC container runtime (workflow profile) | <https://apptainer.org> |
| BioContainers | Source of the default DIA-NN 1.8.1 image | <https://biocontainers.pro> |
| DuckDB | In-process engine for querying the QPX Parquet archive | <https://github.com/duckdb/duckdb> |
| MuData (.h5mu) | Multimodal container for single-cell export | <https://github.com/scverse/mudata> |
| scverse | Single-cell analysis ecosystem (downstream of MuData export) | <https://scverse.org> |
|  |  |  |
| PRIDE Archive | Source repository for deposited datasets | <https://www.ebi.ac.uk/pride> |
| ProteomeXchange | Data-deposition consortium / dataset search API | <https://www.proteomexchange.org> |
| MassIVE | Source repository for the plexDIA cohort | <https://massive.ucsd.edu> |
| UniProt | Reference protein sequences (search FASTA) | <https://www.uniprot.org> |
| Cellosaurus | Cell-line nomenclature and tissue annotation | <https://www.cellosaurus.org> |
